# Supplementary material for: Intense white emission from a single-upconversion nanoparticle and tunable emission colour with laser power
Source: Royal Society of Chemistry journal article supplement (doi:10.1039/c6tc01437b), 2016-01-01
Supplement: c6tc01437b1.pdf [file c6tc01437b1.pdf]

***Supporting Information for***  
**Powerful White Emission from a Single Upconversion Nanoparticle**  
**and Tunable Emission Color with Laser Power**

Min Hu<sup>a\*</sup>, Dandan Ma<sup>a</sup>, Chengcheng Liu<sup>b</sup>, Jing Wang<sup>c</sup>, Zhenxi Zhang<sup>c</sup>, Lingjie Meng<sup>a\*</sup>

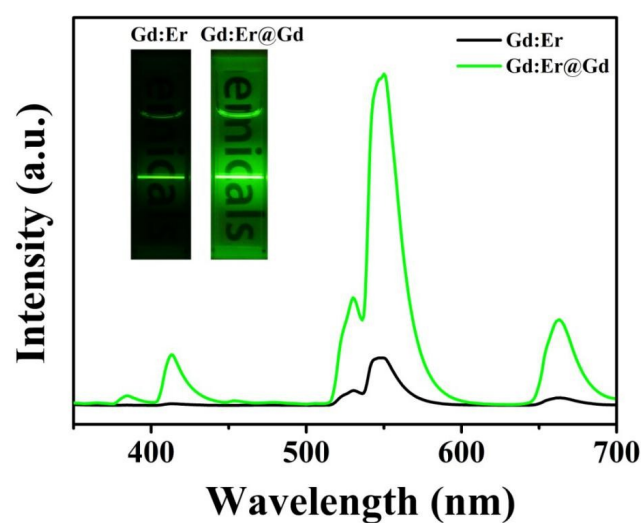

**Fig. S1** Room-temperature luminescence spectra of Gd:Er and Gd:Er@Gd nanoparticles under the 980 nm laser excitation. Inset is the respective luminescence photographs of these two nanoparticles. Concentration of the samples is 1mg.ml<sup>-1</sup>; laser power is 300 mW.

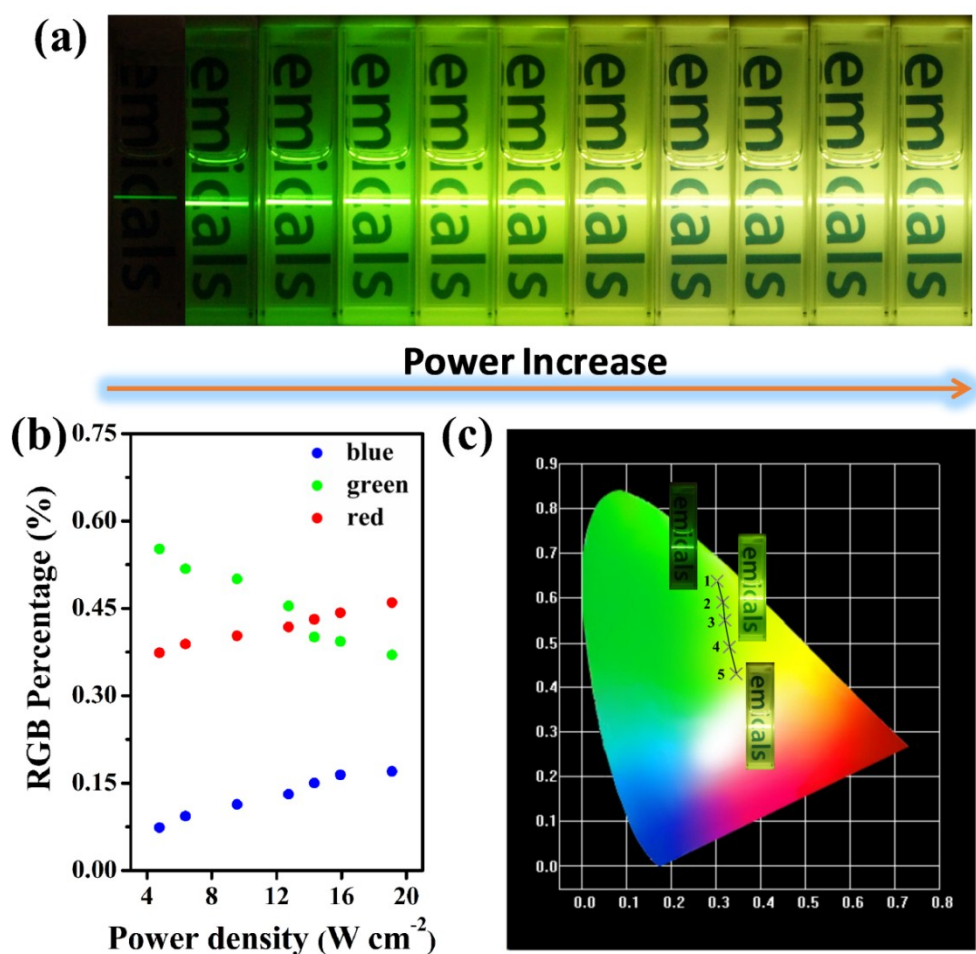

**Fig. S2** Power dependent measurement of color-tunable Gd:Er@Gd@Gd:Tm nanoparticles. (a) Luminescence photographs of Gd:Er@Gd@Gd:Tm nanoparticles in n-hexane under increasing the excitation power from 150 mW to 600 mW. (b) Corresponding emission intensity ratio of RGB measured as a function of power density ( $5 \text{ W} \cdot \text{cm}^2$  to  $19 \text{ W} \cdot \text{cm}^2$ ). (c) Color gamut of the emission colors in the CIE 1931 chromaticity diagram and corresponding luminescence photographs at low, medium and high power.

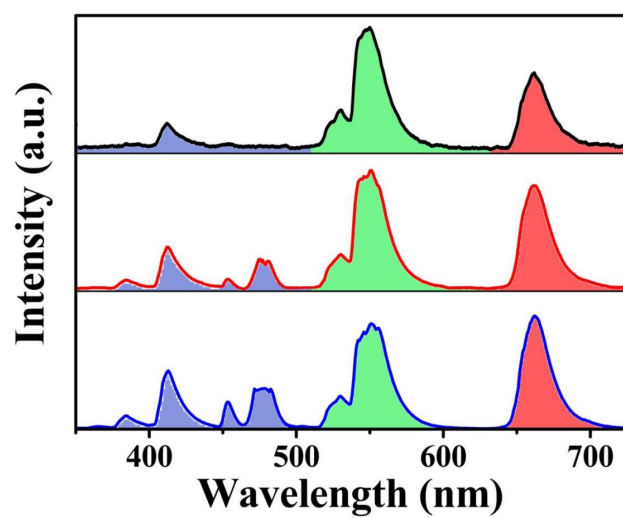

**Fig. S3** (a) Room-temperature luminescence spectra of C/2S nanoparticles under the excitation of 980 nm laser with powers of 100 (black line), 350 (red line) and 600 mW (blue line).
